# Supplementary material for: Electrochemical construction of three-dimensional porous Mn3O4 nanosheet arrays as an anode for the lithium ion battery
Source: Royal Society of Chemistry journal article supplement (doi:10.1039/c6cp03374a), 2016-01-01
Supplement: c6cp03374a1.pdf [file c6cp03374a1.pdf]

### Electronic Supplementary Information

Electrochemical construction of three dimensional porous  $\text{Mn}_3\text{O}_4$  nanosheet arrays as anode of  
ultrahigh performance lithium ion battery

Xiao-Yong Fan\*, Cui Yu, Pan Liu, Lei Gou, Lei Xu, Dong-Lin Li

School of Materials Science and Engineering, Chang'an University, Xi'an 710061, China

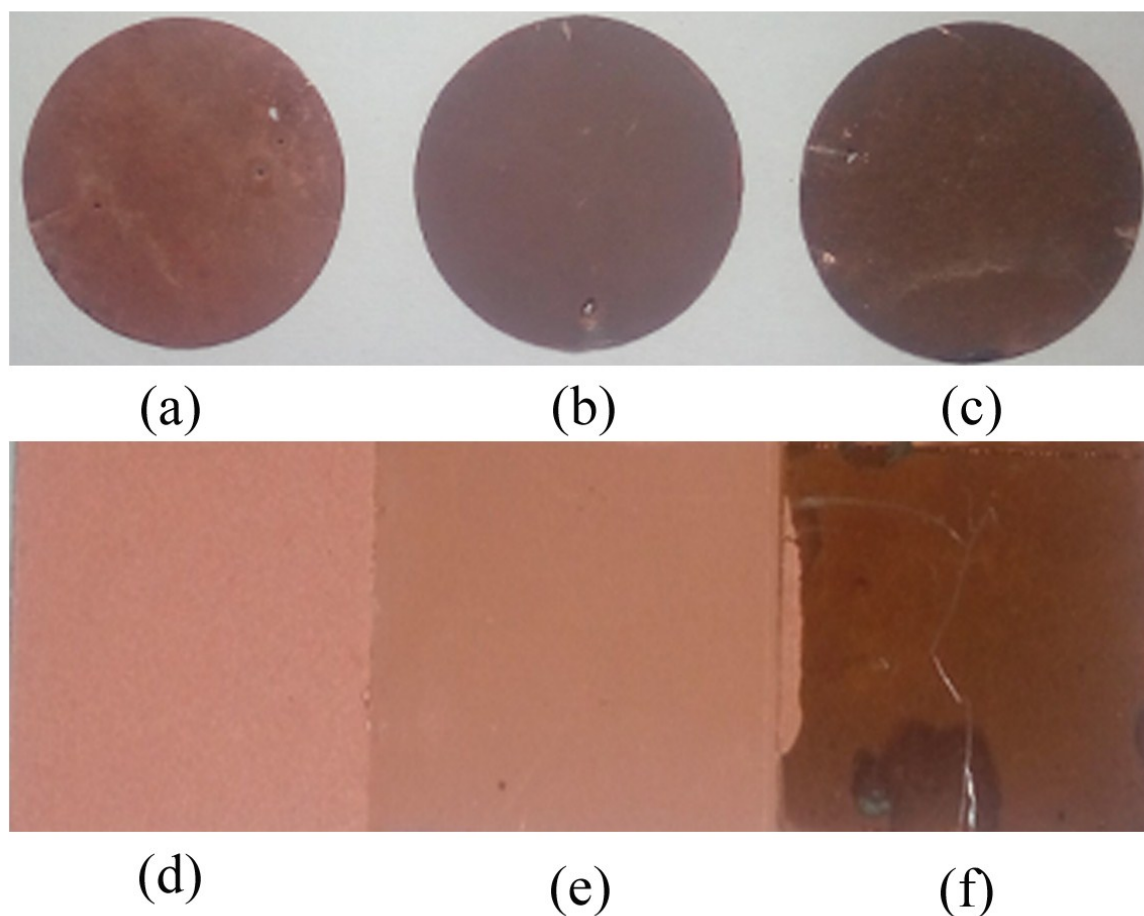

Fig. S1 photos of 3D porous Cu (a), as-deposited 3D porous  $\text{MnO}_x\text{H}_y$  before (b) and after (c) exposing in air for 48 h, Cu foil (d), as-deposited  $\text{MnO}_x\text{H}_y$  before (e) and after (f) exposing in air for 48 h.

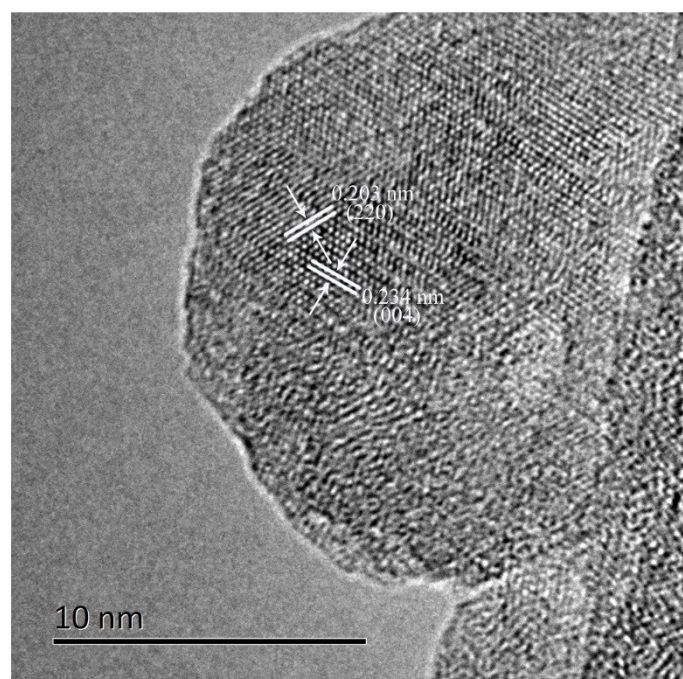

Fig. S2 TEM image of as-deposited 3D porous  $\text{MnO}_x\text{H}_y$  after exposing in air.

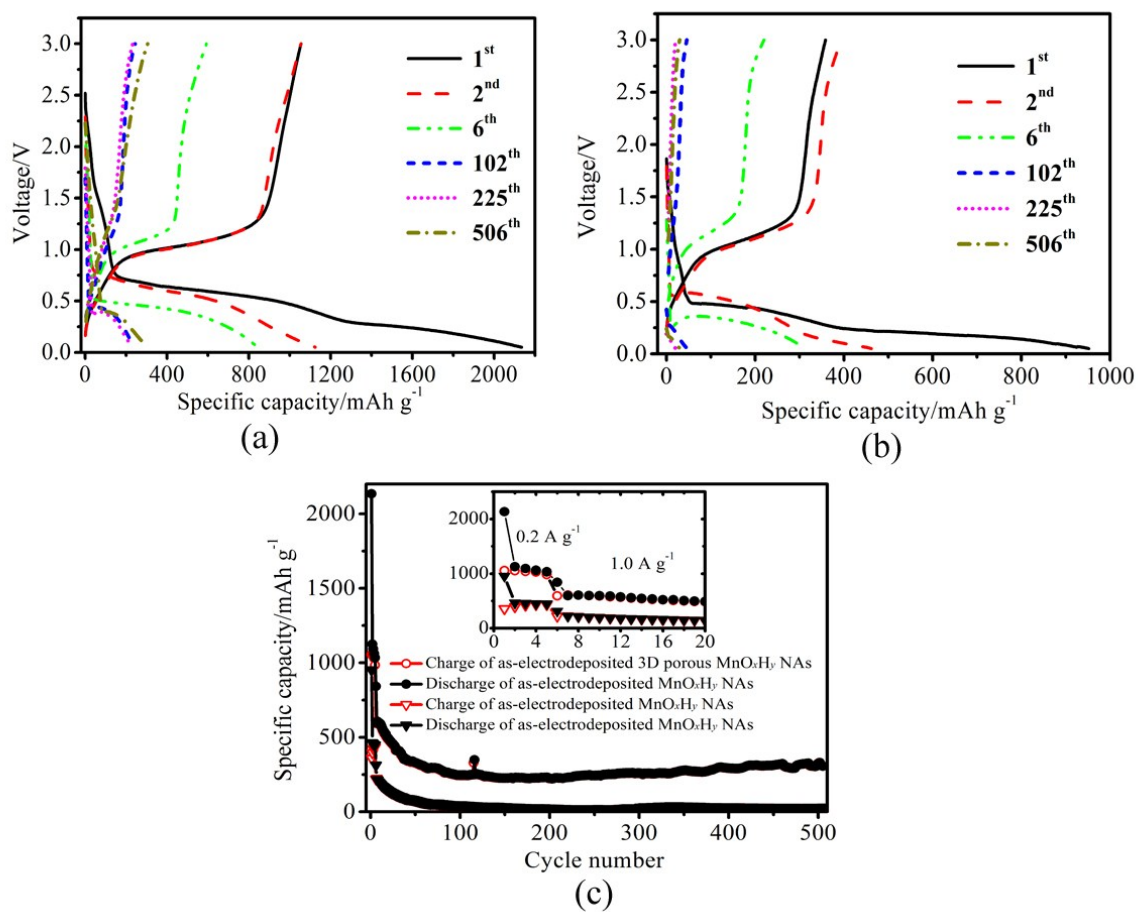

Fig. S3 Charge/discharge curves of the as-electrodeposited 3D porous  $\text{MnO}_x\text{H}_y$  NAs (a) and as-electrodeposited  $\text{MnO}_x\text{H}_y$  NAs (b), and their cyclability curves (c).
